# Supplementary material for: Parasitoid Wasp Acerophagus papayae: A Promising Solution for the Control of Papaya Mealybug Paracoccus marginatus in Cassava Fields in Vietnam
Source: MDPI journal article supplement (doi:10.3390/insects14060528), 2023-06-06
Supplement: s1 [file s1]

**Table S1.** Development time of each stage and life cycle of *Acerophagus papaya*

| Development stage      | Variable<br>(days) | Development stage (days) |
|------------------------|--------------------|--------------------------|
|                        |                    | AVG $\pm$ SE             |
| Egg                    | 3 - 4              | 3.7 $\pm$ 0.16           |
| 1 <sup>st</sup> instar | 1 - 2              | 1.7 $\pm$ 0.16           |
| 2 <sup>nd</sup> instar | 1 - 3              | 2.0 $\pm$ 0.19           |
| 3 <sup>rd</sup> instar | 1 - 3              | 2.2 $\pm$ 0.22           |
| Total larvae           | 3 - 5              | 4.2 $\pm$ 0.22           |
| Pre-pupae              | 2 - 3              | 2.7 $\pm$ 0.16           |
| Pupae                  | 7 - 9              | 8.0 $\pm$ 0.28           |
| Total pupae            | 9 - 11             | 10.0 $\pm$ 0.28          |
| Total life cycle       | 15 - 17            | 16.0 $\pm$ 0.32          |

*Note:* Host was the *P. marginatus* at second instar; AVG: average. SE: Standard error; *n* = 10.

**Table S2.** Egg-laying of the *Acerophagus papaya*

| Day<br>observation | Number of egg   |
|--------------------|-----------------|
| 1                  | 67              |
| 2                  | 61              |
| 3                  | 59              |
| 4                  | 60              |
| 5                  | 57              |
| 6                  | 60              |
| 7                  | 64              |
| 8                  | 63              |
| 9                  | 54              |
| 10                 | 63              |
| Variable           | 54 - 67         |
| AVG $\pm$ SD       | 60.8 $\pm$ 1.17 |

*Note:* AVG: average. SE: standard error. *n* = 10
